# Supplementary figures and images for: Nonsurgical Rhinoplasty: A Graft-based Technique
Source: PubMed Central journal article supplement — Plast Reconstr Surg Glob Open. 2019 Jun 25;7(6):e2241. doi: 10.1097/GOX.0000000000002241 (PMC6635207; doi:10.1097/gox.0000000000002241), 2019-06-25

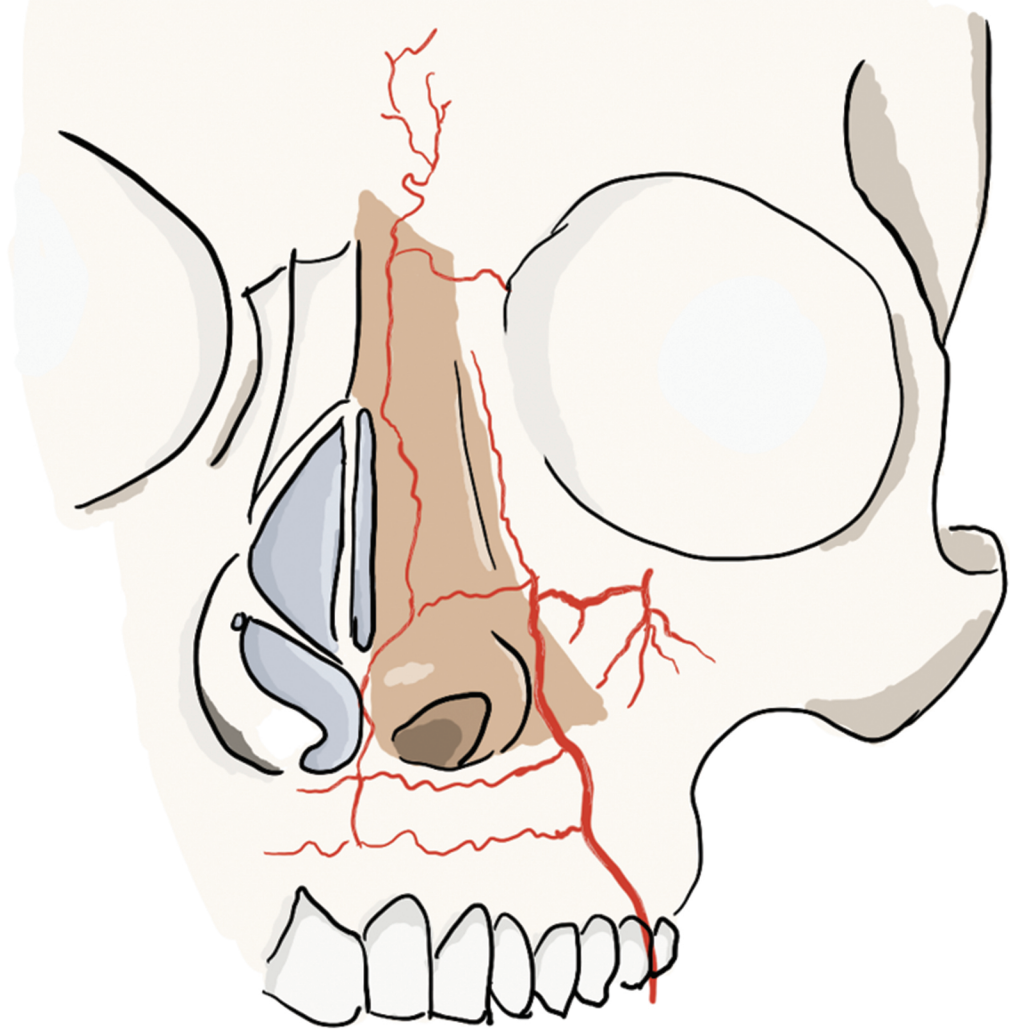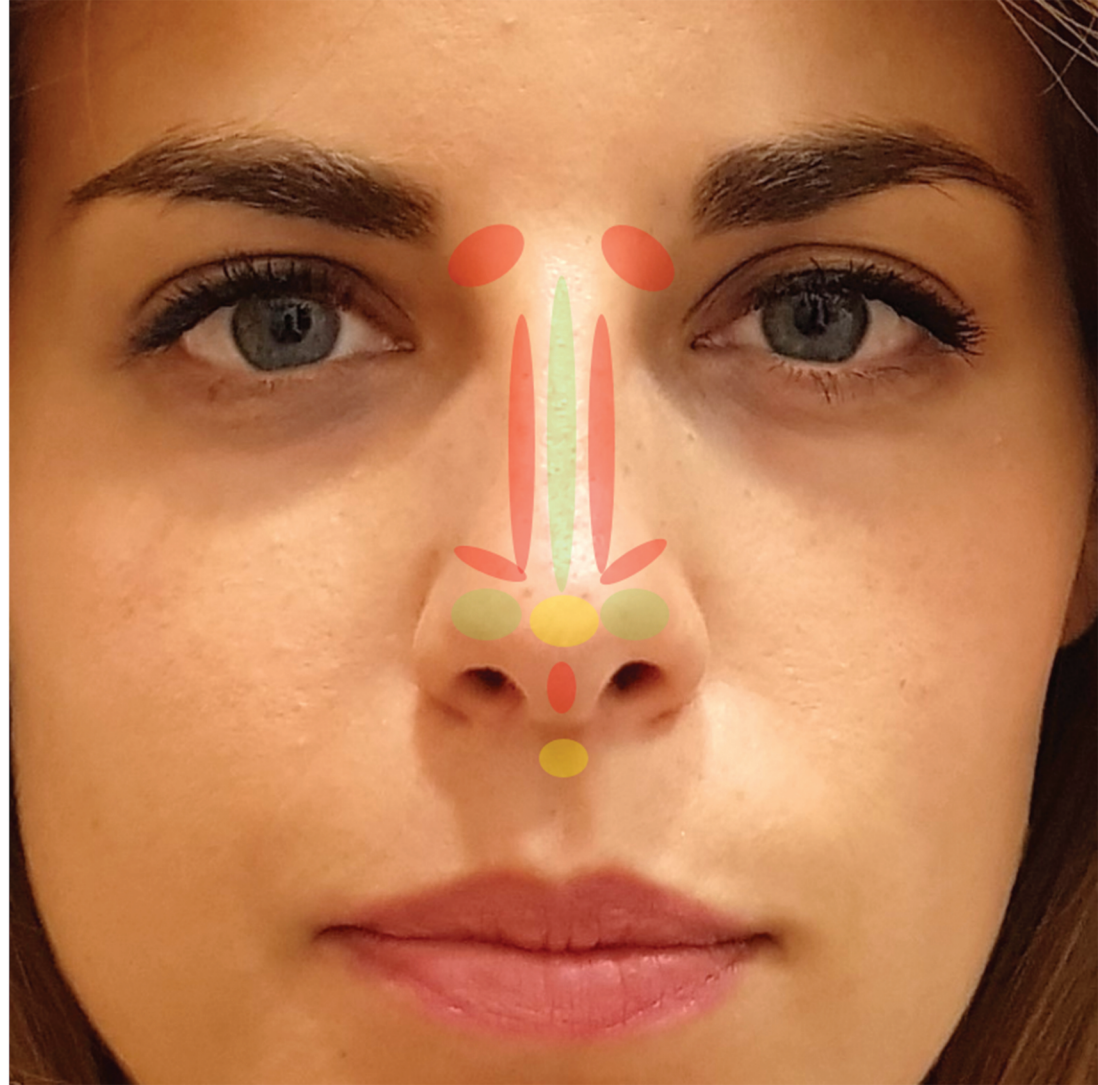

Supplement: gox-7-e2241-s001.pdf [file gox-7-e2241-s001.pdf]

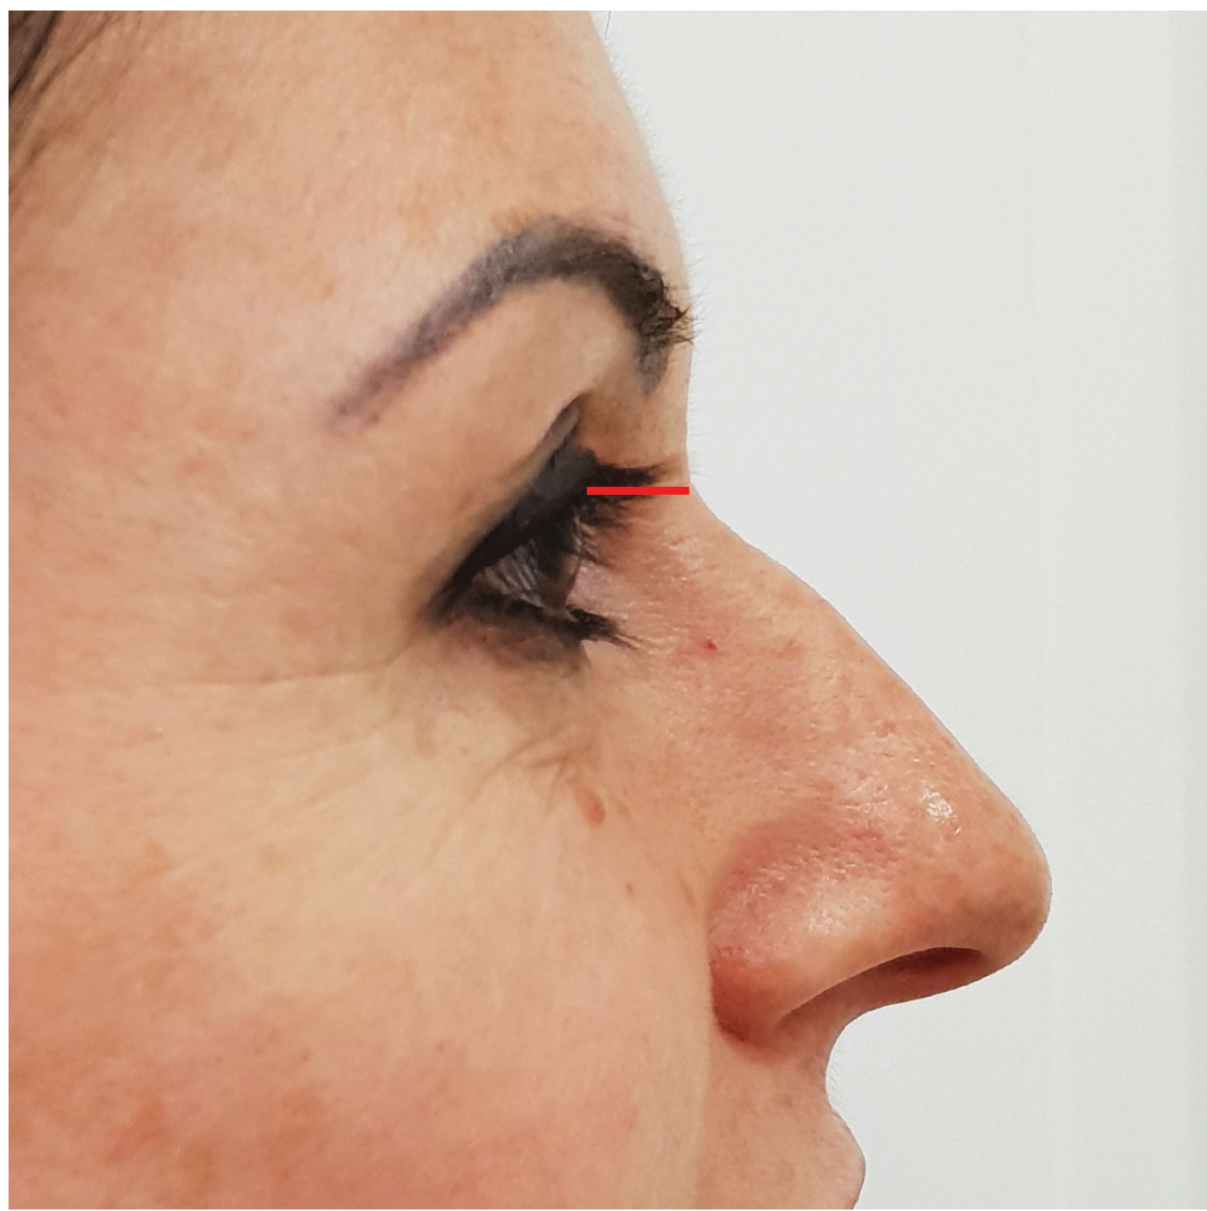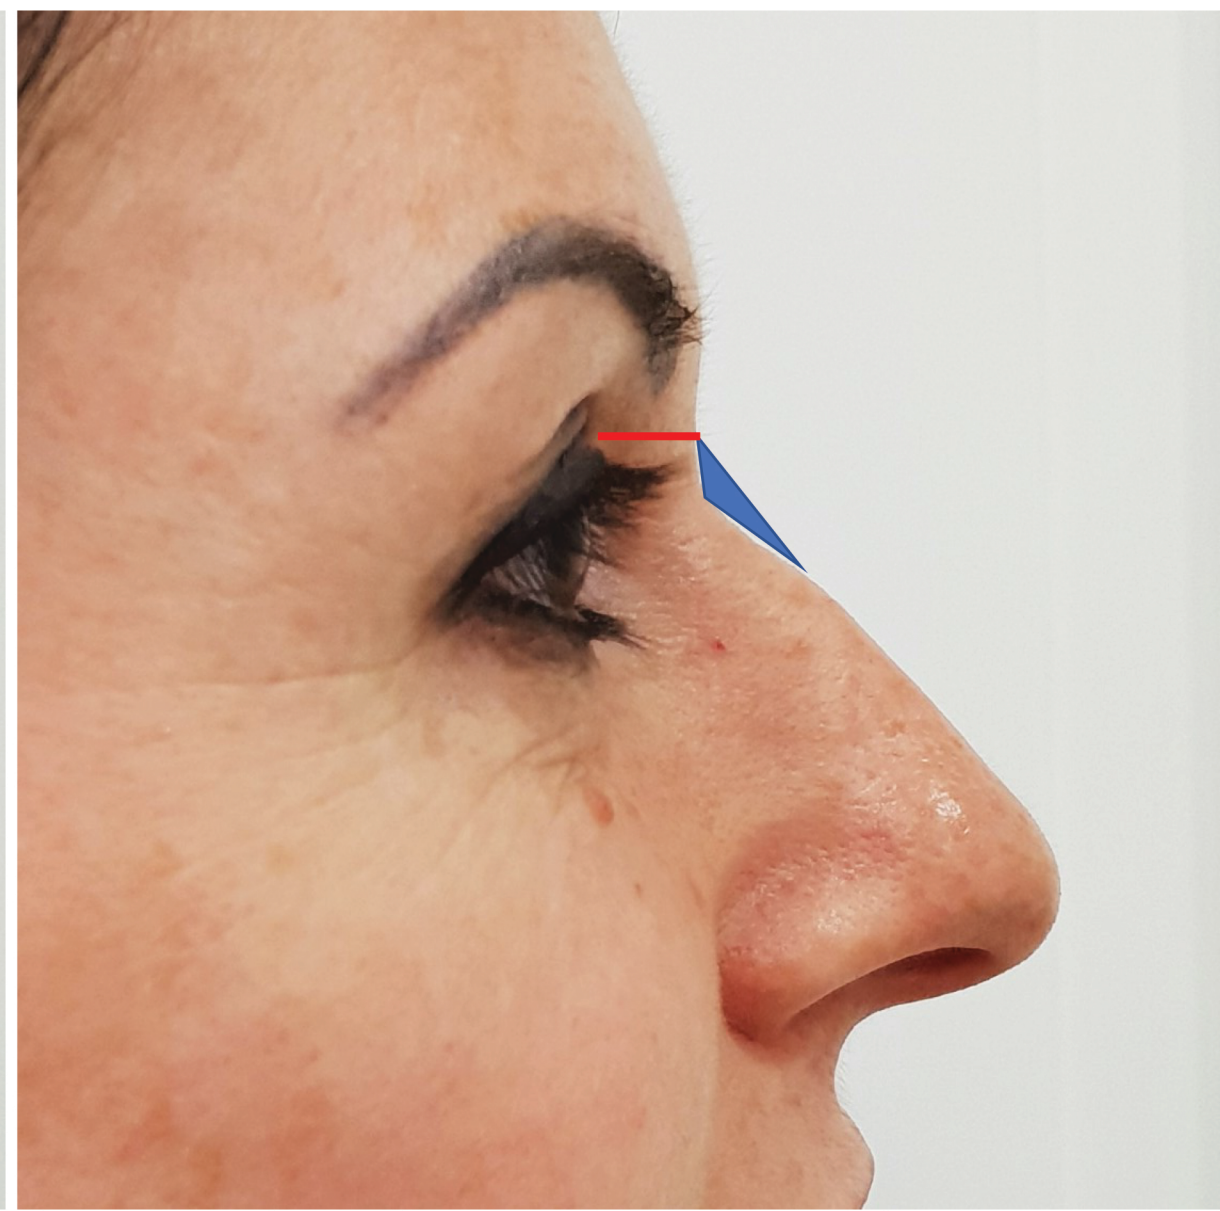

Supplement: gox-7-e2241-s002.pdf [file gox-7-e2241-s002.pdf]

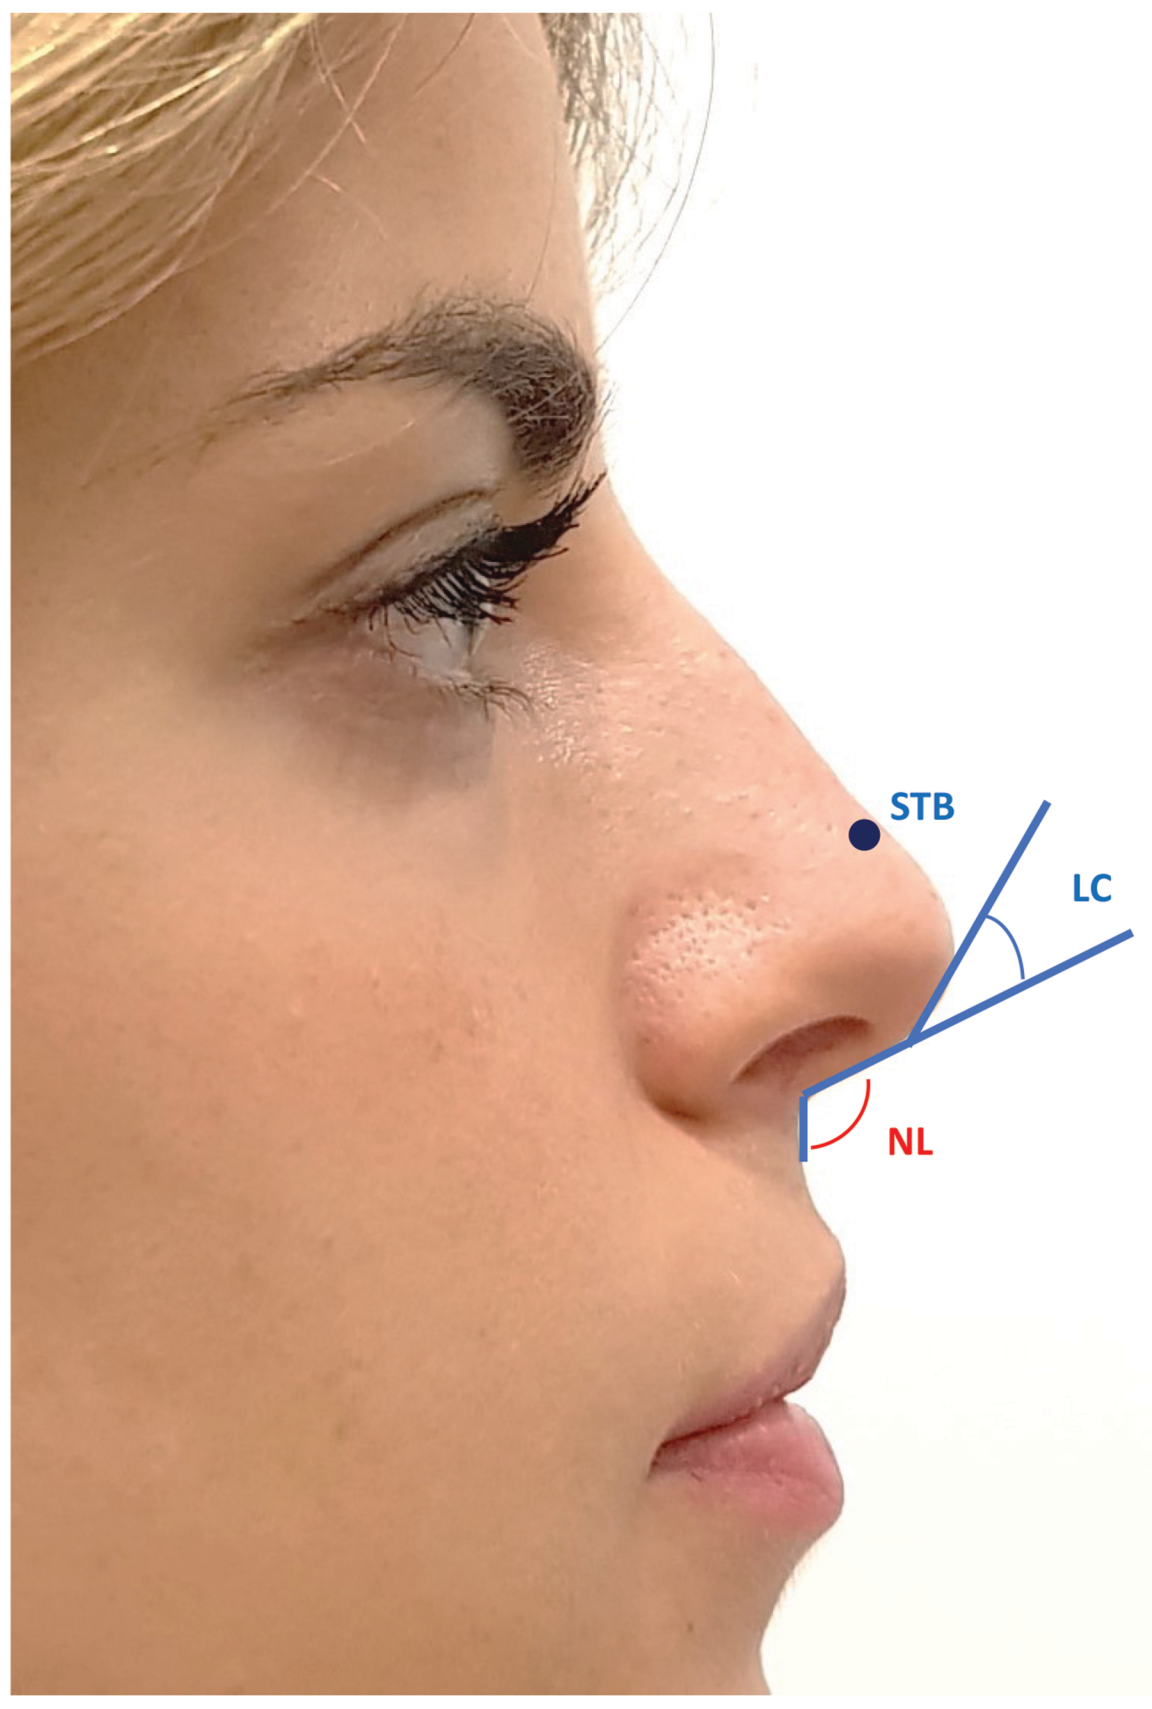

STB

LC

NL

Supplement: gox-7-e2241-s003.pdf [file gox-7-e2241-s003.pdf]

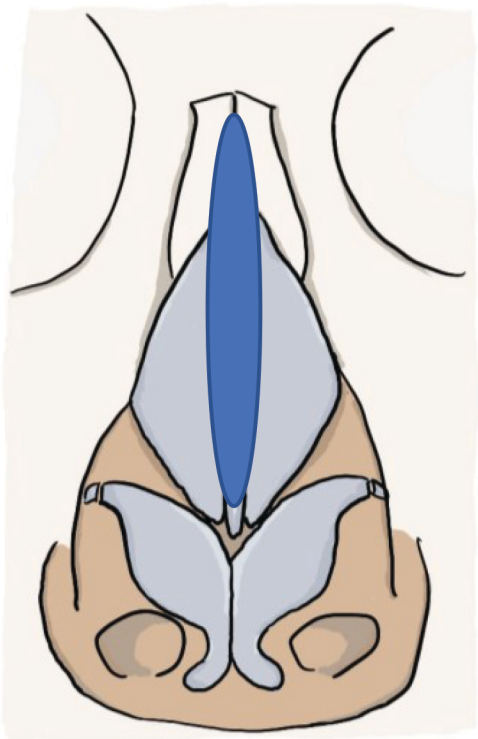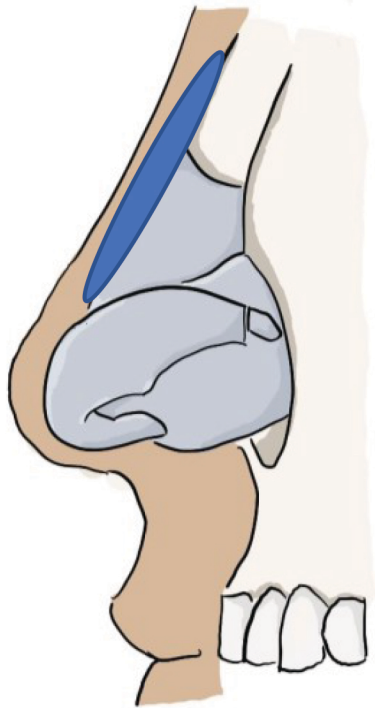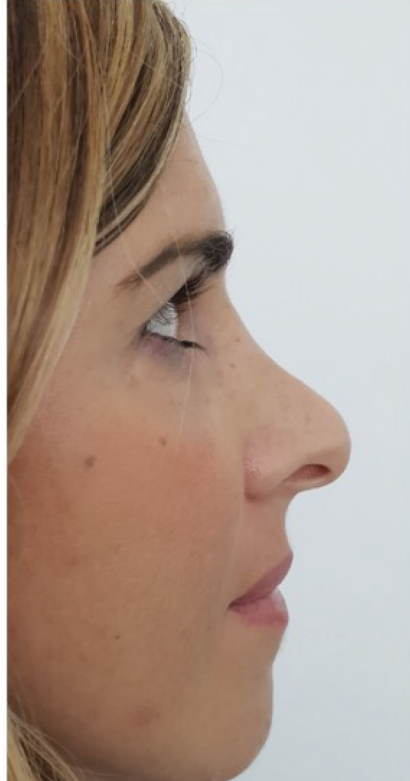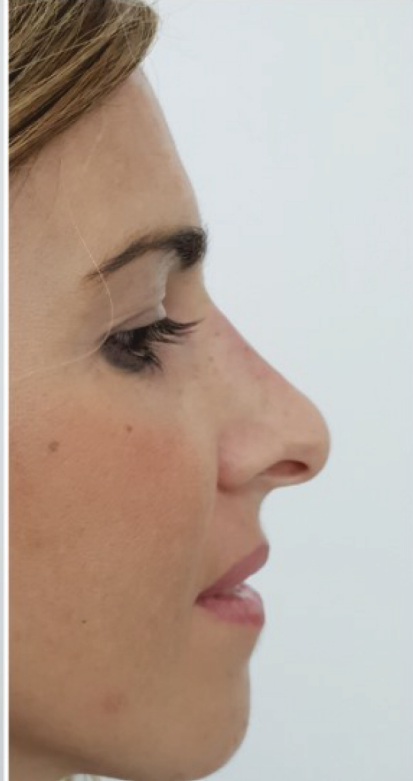

Supplement: gox-7-e2241-s004.pdf [file gox-7-e2241-s004.pdf]

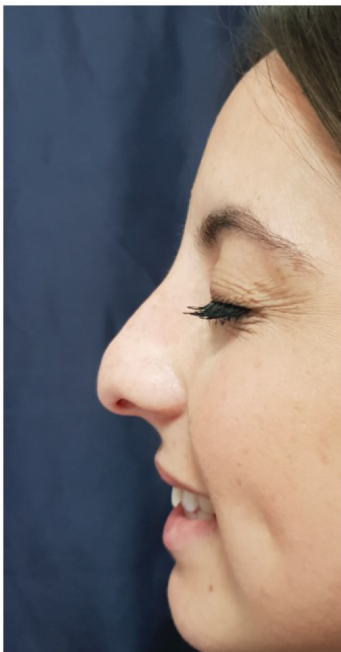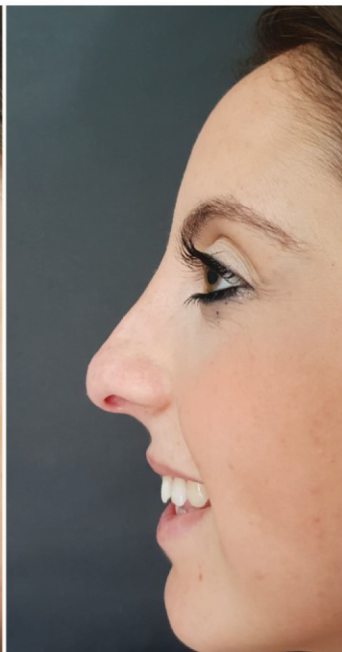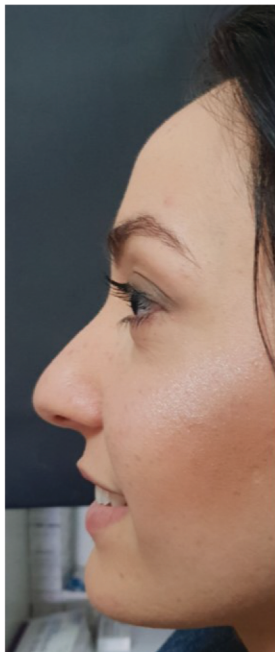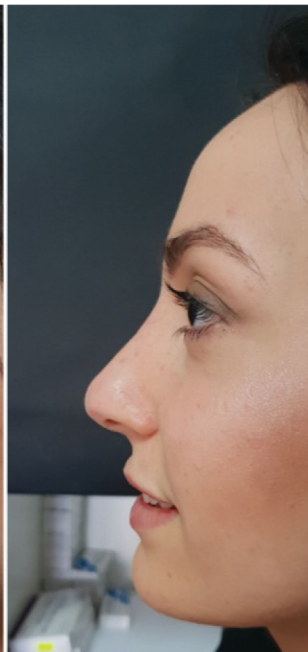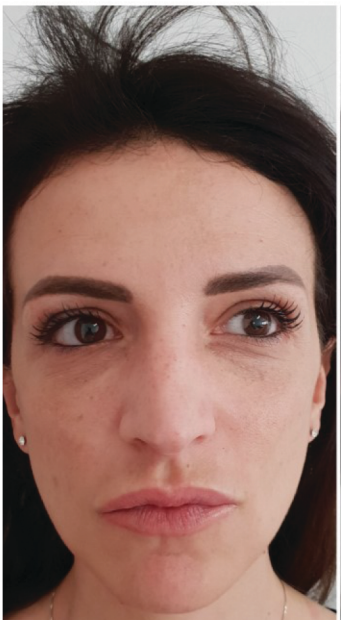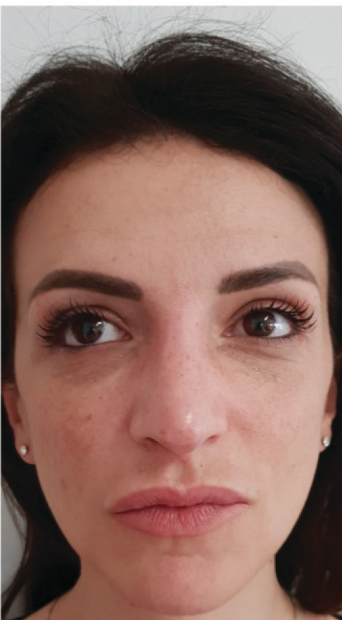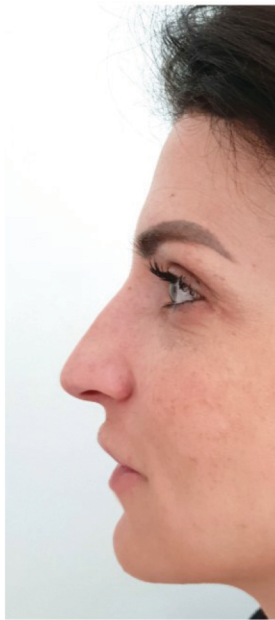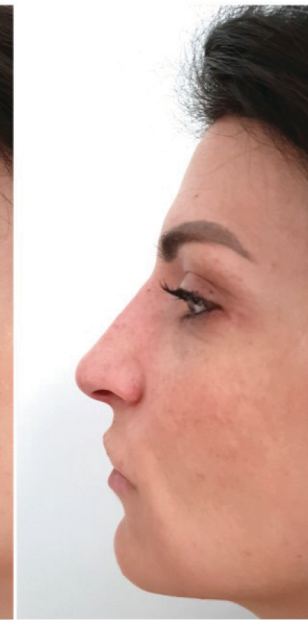

Supplement: gox-7-e2241-s005.pdf [file gox-7-e2241-s005.pdf]
